# Supplementary material for: Effects of Sodium-Glucose Co-Transporter-2 (Sglt2) Inhibitors on Major Cardiovascular Events in Type 2 Diabetic Patients a Meta-Analysis of Randomized Controlled Trials
Source: Research Square preprint supplement (doi:10.21203/rs.3.rs-278204/v1), 2021-03-11
Supplement: Supplementary file 1 [file 7bfaed475ef16bbbaf1c15d0.docx]

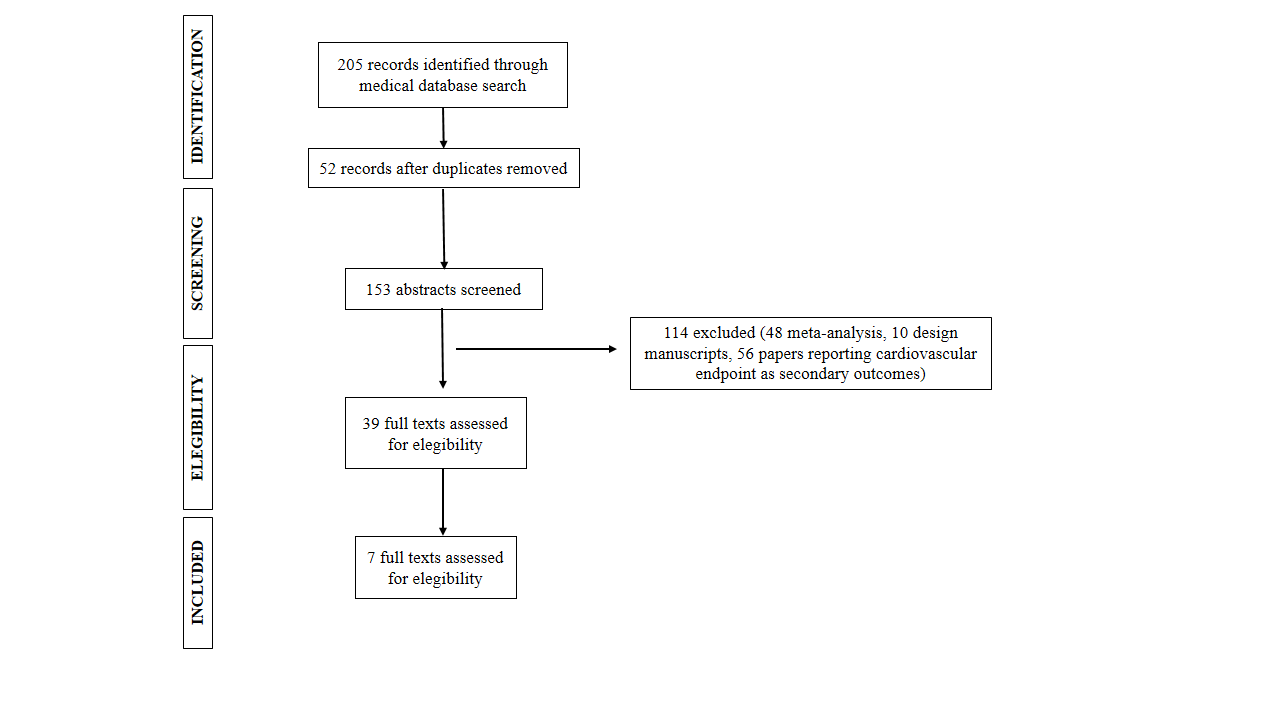


**Figure S1.** Flow-chart of study selection.


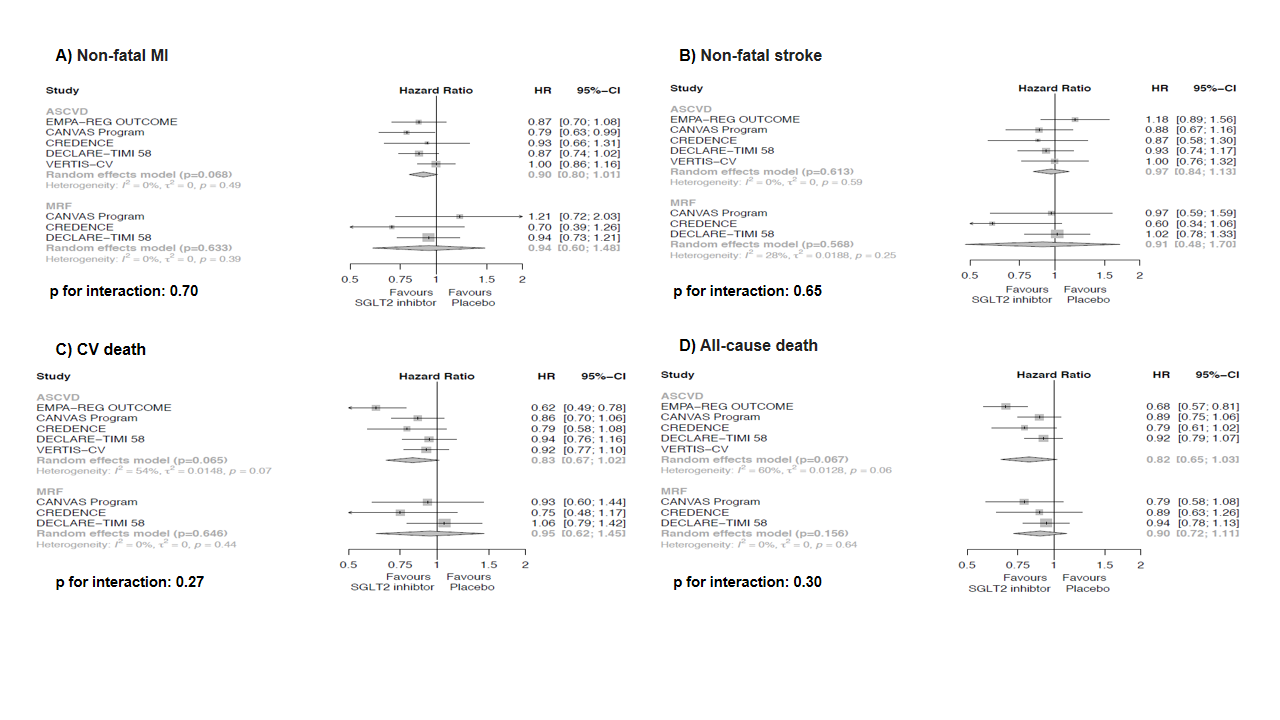


**Figure S2.** Meta-analysis of SGLT2i trials on CV secondary outcomes stratified by the presence of established ASCVD or multiple CV risk factors. (A) Non-fatal MI; (B) Non-fatal stroke; (C) CV death; D) All cause death.

CV: cardiovascular; MI: myocardial infarction; ASCVD: atherosclerotic CV disease; MRF: multiple risk factors.


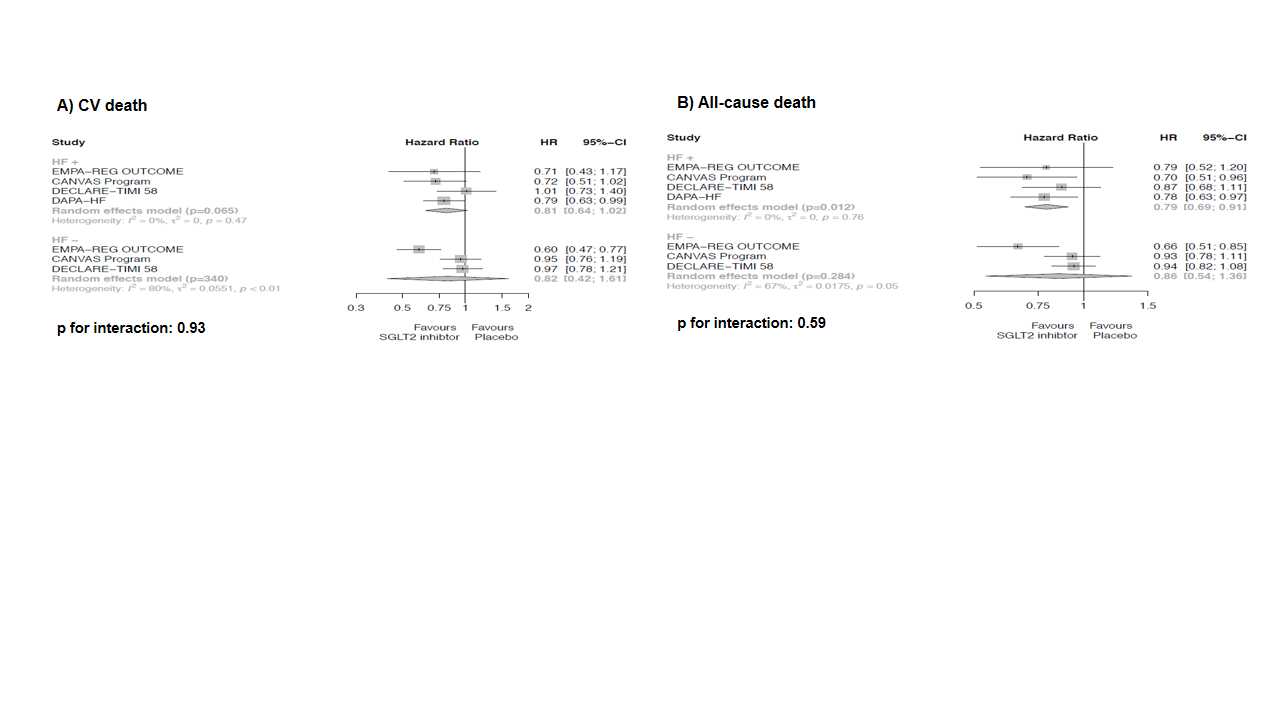


**Figure S3.** Meta-analysis of SGLT2i trials on CV secondary outcomes stratified by the presence (HF+) or not (HF-) of HF at baseline. (A) CV death; (B) All-cause death.

CV: cardiovascular; HF: heart failure.


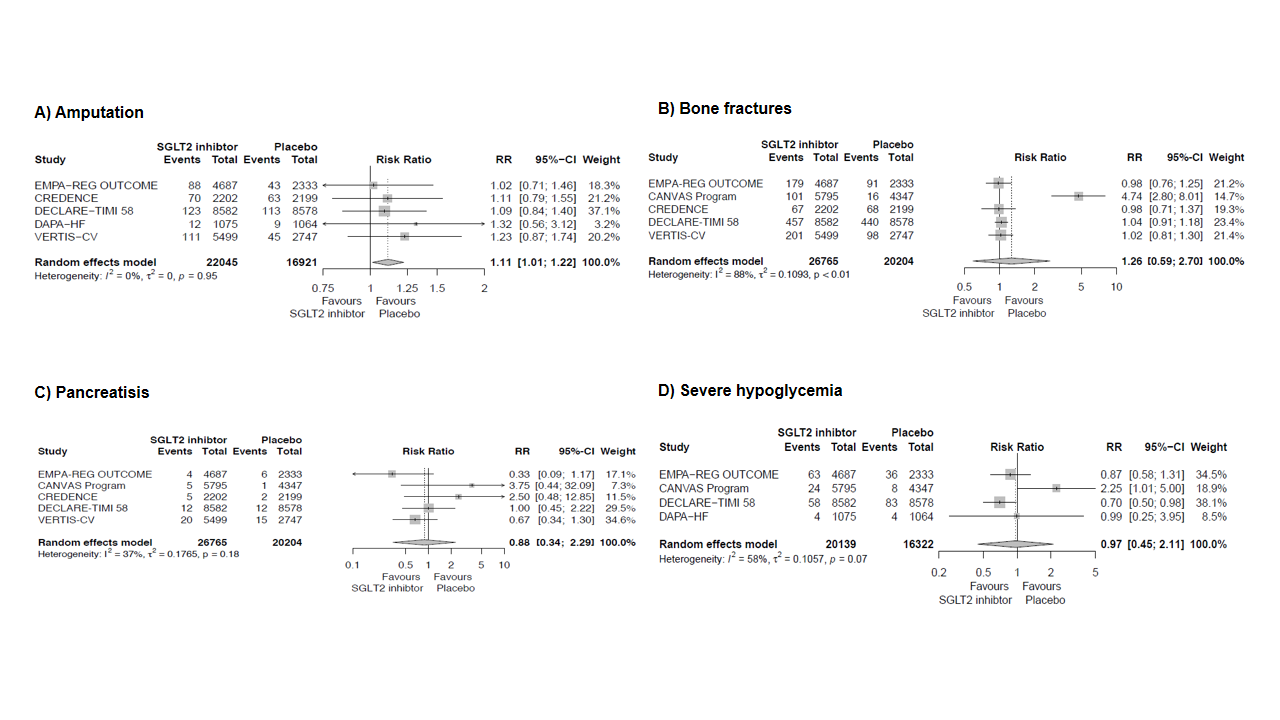


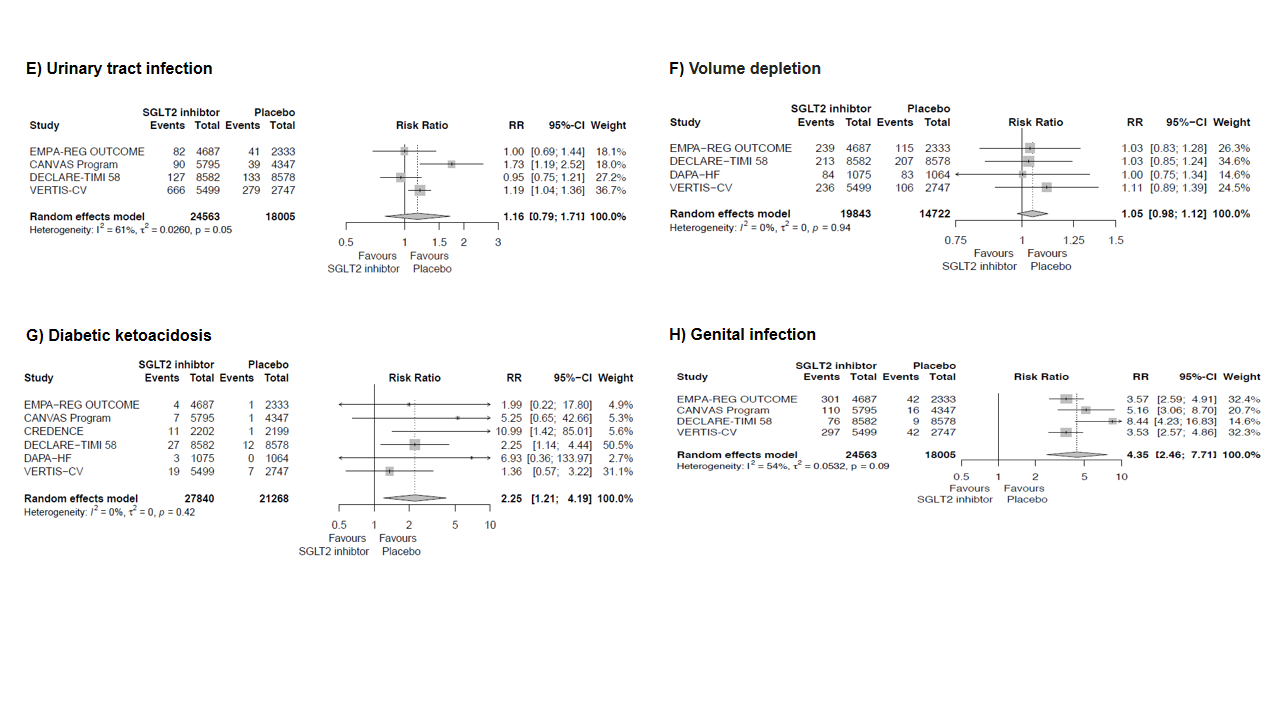


**Figure S4.** Safety analysis. Effects of SGLT2i on (A) amputation, (B) bone fractures, (C) pancreatitis, (D) severe hypoglycemia, (E) urinary tract infections, (F) volume depletion, (G) diabetic ketoacidosis, (H) genital tract infections.
